# Supplementary material for: Peripheral Levels of EPCs, T Cells, and Macrophages’ as Possible Predictive Biomarkers of Acute Myocardial Infarction
Source: Research Square preprint supplement (doi:10.21203/rs.3.rs-107073/v1), 2020-11-24
Supplement: Supplementary file 1 [file 4a21777c2e5e14b21daf398e.docx]

**Supplementary Data**

Peripheral Levels of EPCs, T Cells, and Macrophages’ as Possible Predictive Biomarkers of Acute Myocardial Infarction

**Amankeldi A. Salybekov 1,2, Katsuaki Sakai 3, Makoto Natsumeda 3, Kosit Vorateera 1, Shuzo Kobayashi 2, Yuji Ikari 3, and Takayuki Asahara 1, ***

1 Department of Advanced Medicine Science, Tokai University School of Medicine, 143 Shimokasuya, Isehara, Kanagawa 2591193, Japan.

2 Clinical Research Center, Shonan Kamakura General Hospital, 1370-1 Okamoto, Kamakura, Kanagawa, 2478533.

3 Department of Cardiology, Tokai University School of Medicine, 143 Shimokasuya, Isehara, Kanagawa, 2591193.

**Supplemental Figure S1.** (**A**)Spearman’s correlation rank test of cardiac vessels lesionnumber vs total CD34+ cells number. (**B**). Chi-square test for analyses of cardiac vessels lesion numbers at day three and seven after onset AMI. (**C**) Correlation rank test of MAGE vs total M1 and M2 cells number.


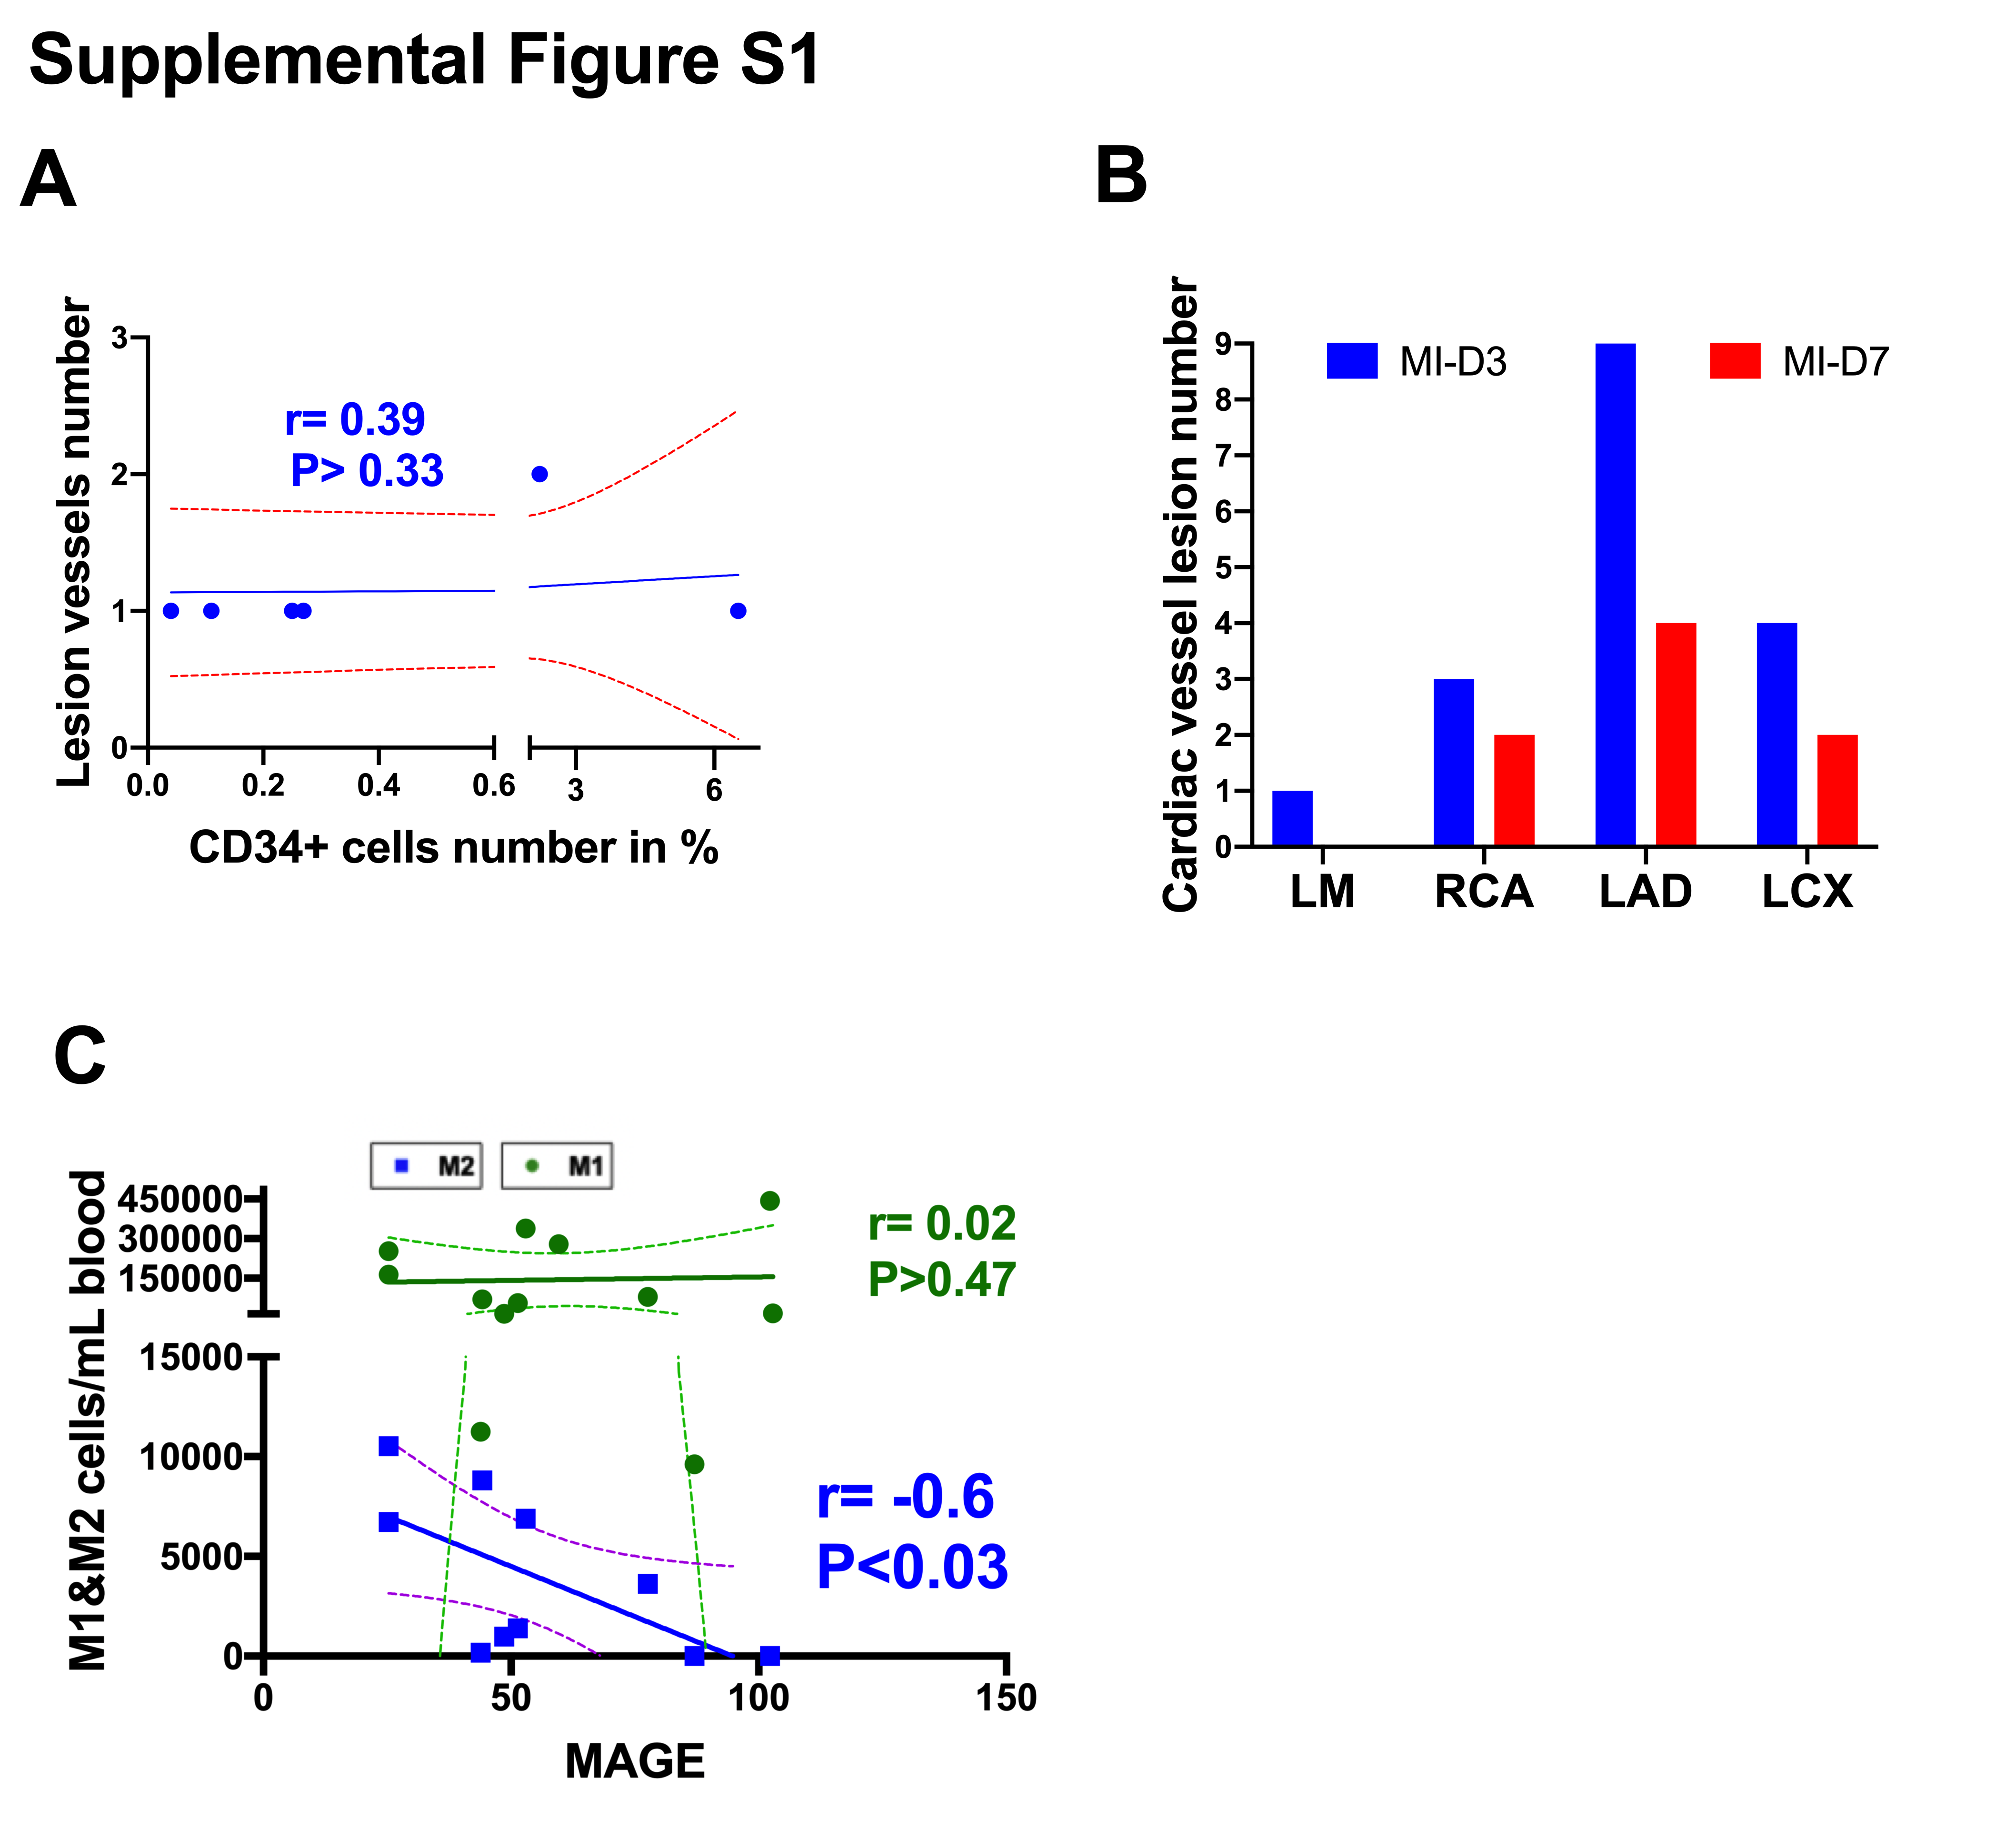


**Supplemental Table 1. Patient & Control groups characteristics**

| **Variables** | **MI-D3 (n=11)** | **MI-D7 (n=7)** | **Controls (n=16)** | ***P* - value** |
| --- | --- | --- | --- | --- |
| Age, years ± SD | 67.5±11.6# | 61.7±12.4 | 43.3±15.5 | <0.0001 |
| Sex, *n* |  |  |  |  |
| Male | 10 (11) | 6 (7) | 14 | *n.s* |
| Female | 1 (11) | 1 (7) | 2 | *n.s* |
| Smoking, n |  |  |  |  |
| Former and current | 5 (11) | 5 (7) | 2 | *n.s* |
| Never | 6 (11) | 2 (7) | 14 | *n.s* |
| BMI (kg/m2) | 23±2.6 | 24.06±2.7 | 21.5±1.5 | *n.s* |
| Diseases, n |  |  |  |  |
| STEMI | 12 | 12 | - | *n.s* |
| NSTEMI | 2 | 2 | - | *n.s* |
| UAP | 2 | 2 | - | *n.s* |
| Diabetes, n |  |  |  |  |
| past T2DM | 5 | 5 | - | *n.s* |
| newly diagnosed T2DM | 11 | 11 | - | *n.s* |
|  |  |  |  |  |
| **Patients laboratory and functional data** | | | | |
| LDL (mg/dL) | 123.7±38.6 | 145.7±53.10 | - | *n.s* |
| HDL (mg/dL) | 44.7±8.24 | 48.3±15.4 | - | *n.s* |
| Triglyceride (mg/dL) | 120.9±72.4 | 160±101 | - | *n.s* |
| non-HDL cholesterol (mg/dL) | 165.5±54.8 | 222.4±63 | - | *n.s* |
| Total cholesterol (mg/dL) | 62.3±24.34 | 69.7±16.8 | - | *n.s* |
| maxCK-MB | 258.8±216.8 | 1193.14±2279.4 | - | *n.s* |
| BNP (pg/mL) | 105.04±177.5 | 54.72±68.9 | - | *n.s* |
| Troponin T (ng/mL) | 475±843.7 | 213±241.6 | - | *n.s* |
| HbA1c (%) | 6.64±1.9 | 6.12±0.7 | - | *n.s* |
| Ejection fraction (%) | 58.81±9 | 57.57±13.86 | - | *n.s* |
